# Supplementary material for: Direct Observation of the Uptake of Outer Membrane Proteins by the Periplasmic Chaperone Skp
Source: PubMed Central journal article supplement (PMC3458824; doi:10.1371/journal.pone.0046068), 2012-09-26
Supplement: pone.0046068.s013.pdf [file pone.0046068.s013.pdf]

**Table S1** Summary of protein mutants and PCR primers used in this study \*

| Protein mutants | Primer  | DNA sequences (5'-3')                      |
|-----------------|---------|--------------------------------------------|
| Skp-K55C        | Forward | GCAGTCCATGT <u>GCGCGGGCAGCG</u>            |
|                 | Reverse | CGCTGCCCCGCGCACATGGACTGC                   |
| Skp-E82C        | Forward | AAGCGCAGGCTTTTT <u>TGCCAGGATCGCGCACG</u>   |
|                 | Reverse | AAAAGCCTGCGCTTTCTGAGCAAAAGTCTGG            |
| Skp-D128C       | Forward | CAACAGCAGCT <u>TGTGTAAAAGACATCACTGCCG</u>  |
|                 | Reverse | GATGTCTTTTAC <u>ACAGCTGCTGTTGTAAGCAAC</u>  |
| OmpC-D25C       | Forward | CACTATTTCTCTT <u>GTAACAAAGATGTAGATGGCG</u> |
|                 | Reverse | CTACATCTTTGTT <u>ACAAGAGAAATAGTGCAGGC</u>  |
| OmpC-L139C      | Forward | CTTCTTCGGTT <u>TGTGTTGACGGCCTGAACTTTG</u>  |
|                 | Reverse | GCCGTCAAC <u>ACAACCGAAGAAGTCAGTG</u>       |
| OmpC-D290C      | Forward | GTCGTGGCTACT <u>TGCGACGAAGATATCCTG</u>     |
|                 | Reverse | ATATCTTCGTC <u>GCAGTAGCCACGACCCAG</u>      |

\* A pair of forward and reverse primers was used to create each mutant. Changes in the sequences were shown underlined.
