# Supplementary material for: Direct Observation of the Uptake of Outer Membrane Proteins by the Periplasmic Chaperone Skp
Source: PubMed Central journal article supplement (PMC3458824; doi:10.1371/journal.pone.0046068), 2012-09-26
Supplement: pone.0046068.s014.pdf [file pone.0046068.s014.pdf]

**Table S2** Time constants  $\tau_i$  and respective pre-exponential amplitude  $A_i$  for binding of Skp-Cy3mutants with OmpC-Cy5 obtained from the fitting of the stopped-flow data.

|                |          | Skp-K55C-Cy3         | Skp-E82C-Cy3        | Skp-D128C-Cy3      |
|----------------|----------|----------------------|---------------------|--------------------|
| OmpC-D25C-Cy5  | $\tau_1$ | $73.0 \pm 5.1$ ms    | $101.3 \pm 6.9$ ms  | $143 \pm 10$ ms    |
|                | $A_1$    | $0.655 \pm 0.078$    | $0.573 \pm 0.069$   | $0.609 \pm 0.073$  |
|                | $\tau_2$ | $0.264 \pm 0.018$ s  | $0.437 \pm 0.030$ s | $0.83 \pm 0.056$ s |
|                | $A_2$    | $0.329 \pm 0.039$    | $0.303 \pm 0.032$   | $0.297 \pm 0.035$  |
|                | $\tau_3$ | $40.5 \pm 2.7$ s     | $2.58 \pm 0.18$ s   | $6.88 \pm 0.46$ s  |
|                | $A_3$    | $-(0.181 \pm 0.022)$ | $0.142 \pm 0.015$   | $0.174 \pm 0.020$  |
| OmpC-L139C-Cy5 | $\tau_1$ | $86.3 \pm 6.0$ ms    | $135.2 \pm 9.3$ ms  | $208 \pm 14$ ms    |
|                | $A_1$    | $0.456 \pm 0.055$    | $0.506 \pm 0.061$   | $0.675 \pm 0.081$  |
|                | $\tau_2$ | $0.325 \pm 0.023$ s  | $0.53 \pm 0.037$ s  | $0.94 \pm 0.066$ s |
|                | $A_2$    | $0.299 \pm 0.036$    | $0.271 \pm 0.032$   | $0.283 \pm 0.035$  |
|                | $\tau_3$ | $41.2 \pm 2.8$ s     | $2.89 \pm 0.20$ s   | $6.95 \pm 0.47$ s  |
|                | $A_3$    | $-(0.140 \pm 0.017)$ | $0.151 \pm 0.018$   | $0.183 \pm 0.021$  |
| OmpC-D290C-Cy5 | $\tau_1$ | $115.0 \pm 7.9$ ms   | $180 \pm 13$ ms     | $285 \pm 19$ ms    |
|                | $A_1$    | $0.503 \pm 0.060$    | $0.572 \pm 0.069$   | $0.641 \pm 0.077$  |
|                | $\tau_2$ | $0.65 \pm 0.045$ s   | $0.96 \pm 0.066$ s  | $1.52 \pm 0.10$ s  |
|                | $A_2$    | $0.305 \pm 0.036$    | $0.282 \pm 0.033$   | $0.278 \pm 0.033$  |
|                | $\tau_3$ | $69.2 \pm 4.7$ s     | $4.29 \pm 0.31$ s   | $9.33 \pm 0.64$ s  |
|                | $A_3$    | $-(0.185 \pm 0.022)$ | $0.146 \pm 0.017$   | $0.187 \pm 0.025$  |
