# Supplementary material for: Direct Observation of the Uptake of Outer Membrane Proteins by the Periplasmic Chaperone Skp
Source: PubMed Central journal article supplement (PMC3458824; doi:10.1371/journal.pone.0046068), 2012-09-26
Supplement: pone.0046068.s016.pdf [file pone.0046068.s016.pdf]

**Table S4** Parameters for nine simulations of Skp and the C-terminal fragment of OmpC in water.

| Skp State | Polypeptide                       | Water   | Cl-   | Simulation Length |         |
|-----------|-----------------------------------|---------|-------|-------------------|---------|
| Open      | C-terminal<br>Fragment of<br>OmpC | Trial 1 | 26324 | 14                | 11.9 ns |
|           |                                   | Trial 2 | 26329 | 14                | 4.0 ns  |
|           |                                   | Trial 3 | 26331 | 14                | 15.1 ns |
|           |                                   | Trial 4 | 26328 | 14                | 16.0 ns |
|           |                                   | Trial 5 | 26327 | 14                | 16.0 ns |
|           |                                   | Trial 6 | 26329 | 15                | 12.0 ns |
|           |                                   | Trial 7 | 25926 | 14                | 16.0 ns |
|           |                                   | Trial 8 | 25916 | 14                | 11.2 ns |
|           |                                   | Trial 9 | 25913 | 14                | 20.0 ns |
