# Supplementary material for: Direct Observation of the Uptake of Outer Membrane Proteins by the Periplasmic Chaperone Skp
Source: PubMed Central journal article supplement (PMC3458824; doi:10.1371/journal.pone.0046068), 2012-09-26
Supplement: pone.0046068.s017.pdf [file pone.0046068.s017.pdf]

**Table S5** The characteristics of polypeptides in molecular dynamics simulations.

| Polypeptide              | Sequence                                         | Number of Hydrophobic Residues | Number of Charged Residues | Length |
|--------------------------|--------------------------------------------------|--------------------------------|----------------------------|--------|
| OmpC N-terminal Fragment | AEVYN <u>K</u> DGN <u>K</u> LDLYG <u>K</u> VDGL  | 8                              | 7                          | 20     |
| OmpA N-terminal Fragment | AP <u>K</u> DNTWYTGAK <u>L</u> GFSQY <u>H</u> DT | 7                              | 5                          | 21     |
| OmpF N-terminal Fragment | AEIYN <u>K</u> DGN <u>K</u> VDLYG <u>K</u> AVGL  | 9                              | 6                          | 20     |
| OmpC C-terminal Fragment | FTR <u>D</u> AGINT <u>D</u> NIVALGLVYQF          | 11                             | 3                          | 21     |
| OmpC Ala Mutant          | Ace-AAVYNAAGNALALYGAVAGL-Nhe                     | 15                             | 0                          | 20     |
| OmpC Asn Mutant          | Ace-ANVYNNNGNNLNLYGNVNGL-Nhe                     | 8                              | 0                          | 20     |
| OmpA Ala Mutant          | Ace-APAANTWYTGAAALGFSQYAAT-Nhe                   | 12                             | 0                          | 21     |
| OmpA Asn Mutant          | Ace-APNNNTWYTGANLGFSQYNNT-Nhe                    | 7                              | 0                          | 21     |
